# Supplementary material for: Exosomes derived from 5-fluorouracil-resistant colon cancer cells are enriched in GDF15 and can promote angiogenesis
Source: PubMed Central journal article supplement (PMC7646166; doi:10.7150/jca.49224), 2020-10-18

### **Supplement Table**

**Table S1.** Information of the qRT-PCR primer sequences.

### **Supplement Figures**

**Figure S1.** IC<sub>50</sub> of 5-FU for human colon cancer HCT-15 and HCT-15/FU cells.

**Figure S2.** Proliferation assay of HUVECs treated with various concentrations of HCT-15 and HCT-15/FU exosomes by live-cell imaging experiment.

**Table S1**

| <b>Primer Name</b> | <b>5' to 3'</b>         |
|--------------------|-------------------------|
| DPP4 (F)           | GGGTCACATGGTCACCAGAG    |
| DPP4 (R)           | TCTGCGTCGTTAAATTGGGCATA |
| FSCN (F)           | CCAGGGTATGGACCTGTCTG    |
| FSCN (R)           | GTGTGGGTACGGAAGGCAC     |
| GDF15 (F)          | GACCCTCAGAGTTGCACTCC    |
| GDF15 (R)          | GCCTGGTTAGCAGGTCCTC     |
| GSTK1 (F)          | TCTGGAAAAGATCGCAACGC    |
| GSTK1 (R)          | GCCCAAAGGCTCCGAATCTG    |
| SPTA (F)           | GCCAACTCAGGAGCCATTGTT   |
| SPTA (R)           | CGGGTCCGTATGGTTTCAGAT   |
| TXNRD1 (F)         | ATATGGCAAGAAGGTGATGGTCC |
| TXNRD1 (R)         | GGGCTTGTCCTAACAAAGCTG   |
| AKR1C1 (F)         | TTCATGCCTGTCCTGGGATTT   |
| AKR1C1 (R)         | CTGGCTTTACAGACACTGGAAAA |
| PFKP (F)           | GCATGGGTATCTACGTGGGG    |
| PFKP (R)           | CTCTGCGATGTTTGAGCCTC    |
| SQSTM1 (F)         | GCACCCAATGTGATCTGC      |
| SQSTM1 (R)         | CGCTACACAAGTCGTAGTCTGG  |
| GFPT1 (F)          | AACTACCATGTTCCCTCGAACGA |
| GFPT1 (R)          | CTCCATCAAATCCACACCAG    |
| GAPDH (F)          | GGAGCGAGATCCCTCCAAAAT   |
| GAPDH (R)          | GGCTGTTGTCATACTTCTCATGG |
| TGFBR1 (F)         | GCTGTATTGCAGACTTAGGACTG |
| TGFBR1 (R)         | TTTTTGTTCCTCACTCTGTGGTT |
| TGFBR2 (F)         | AAGATGACCGCTCTGACATCA   |
| TGFBR2 (R)         | CTTATAGACCTCAGCAAAGCGAC |
| TGFBR3 (F)         | TGGGGTCTCCAGACTGTTTTT   |
| TGFBR3 (R)         | CTGCTCCATACTCTTTTCGGG   |

**Figure S1**

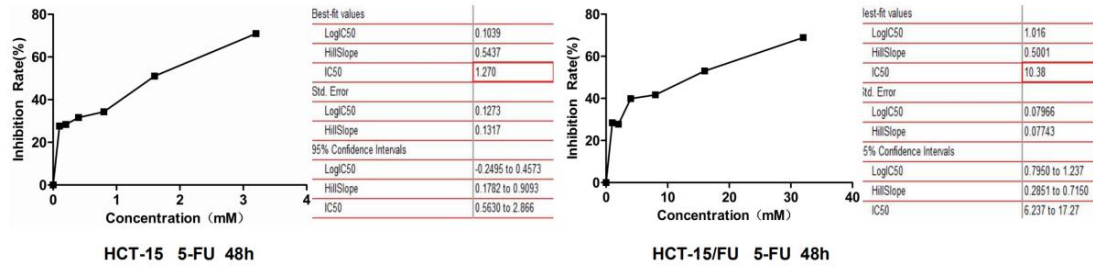

**Figure S2**

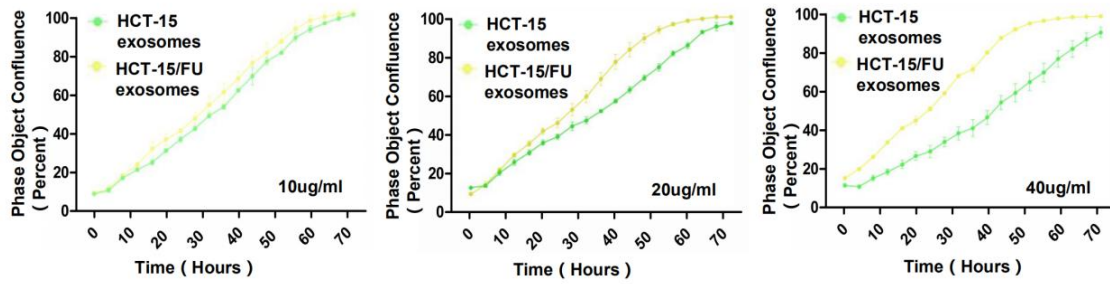

Supplement: jcav11p7116s1.pdf [file jcav11p7116s1.pdf]
